# Supplementary material
Source: PubMed Central journal article supplement (PMC7042040)

## VQI + Medicare Matching Flow Chart for EVAR

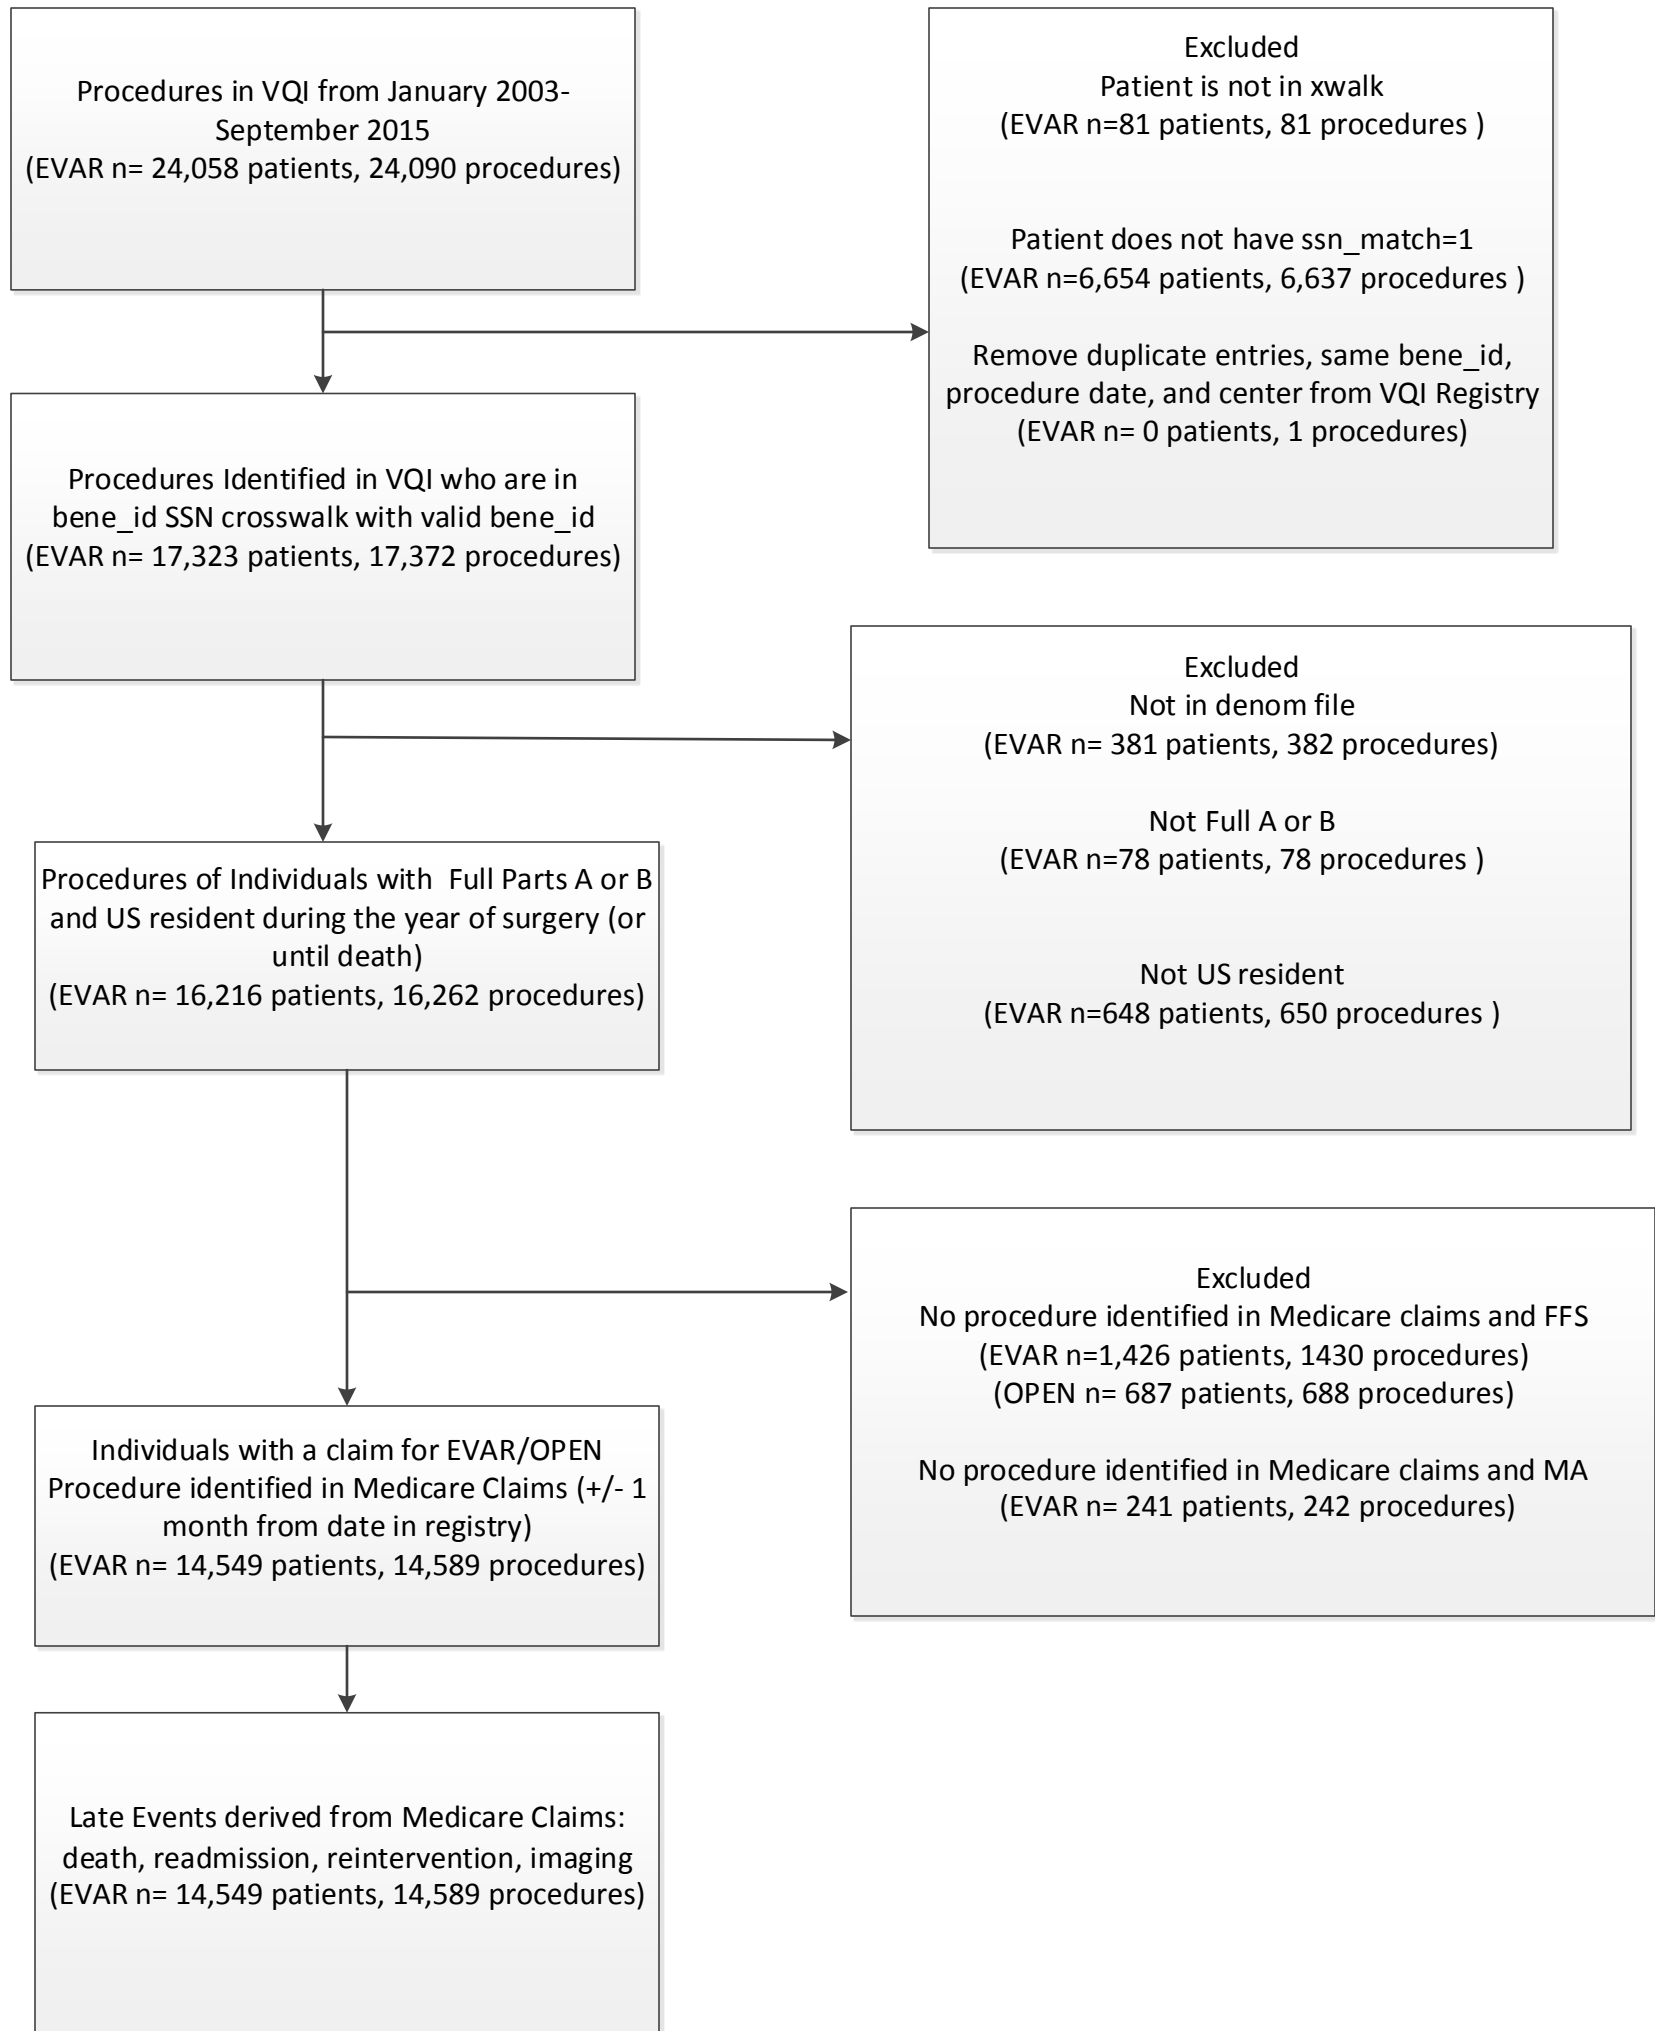

Supplement: NIHMS1535631-supplement-1.pdf [file NIHMS1535631-supplement-1.pdf]
